**Title:** *Rate discrimination training may partially restore temporal processing abilities from age-related deficits*

**Abbreviated title:** Training to restore temporal processing abilities

**Authors:**

Anderson, Samira<sup>1\*</sup>, [sander22@umd.edu](mailto:sander22@umd.edu)  
DeVries, Lindsay<sup>2</sup>, [lindsay.devries@fda.hhs.gov](mailto:lindsay.devries@fda.hhs.gov)  
Smith, Edward<sup>1</sup>, [esmith6@umd.edu](mailto:esmith6@umd.edu)  
Goupell, Matthew J.<sup>1</sup>, [goupell@umd.edu](mailto:goupell@umd.edu)  
Gordon-Salant, Sandra<sup>1</sup>, [sgsalant@umd.edu](mailto:sgsalant@umd.edu)

<sup>1</sup>Department of Hearing and Speech Sciences at University of Maryland, College Park, 20742, USA; <sup>2</sup>Food and Drug Administration, 10903 New Hampshire Ave, Silver Spring, MD 20993-0002

**\*Corresponding Author**

Samira Anderson, Ph.D.  
Department of Hearing and Speech Sciences  
7251 Preinkert Dr.  
College Park, MD 20752  
Phone: (301) 405-4224  
Email: [sander22@umd.edu](mailto:sander22@umd.edu)

**Word Count** Abstract 260, Introduction 613, Discussion 1436

1 **Abstract**

2           The ability to understand speech in complex environments depends on the brain's ability  
3 to preserve the precise timing characteristics of the speech signal. Age-related declines in  
4 temporal processing may contribute to the older adult's experience of communication difficulty  
5 in challenging listening conditions. This study's purpose was to evaluate the effects of rate  
6 discrimination training on auditory temporal processing. A double-blind, randomized control  
7 design assigned 77 young normal-hearing, older normal-hearing, and older hearing-impaired  
8 listeners to one of two treatment groups: experimental (rate discrimination for 100-Hz and 300-  
9 Hz pulse trains) and active control (tone detection in noise). All listeners were evaluated during  
10 pre- and post-training sessions using perceptual rate discrimination of 100-, 200-, 300-, and 400-  
11 Hz band-limited pulse trains and auditory steady-state responses (ASSRs) to the same stimuli.  
12 Training generalization was evaluated using several temporal processing measures and sentence  
13 recognition tests that included time-compressed and reverberant speech stimuli. Results  
14 demonstrated a session  $\times$  training group interaction for perceptual and ASSR testing to the  
15 trained frequencies (100 and 300 Hz), driven by greater improvements in the training group than  
16 in the active control group. Further, post-test rate discrimination of the older listeners reached  
17 levels that were equivalent to those of the younger listeners at pre-test. The training-specific  
18 gains generalized to untrained frequencies (200 and 400 Hz), but not to other temporal  
19 processing or sentence recognition measures. Further, non-auditory inhibition/attention  
20 performance predicted training-related improvement in rate discrimination. Overall, the results  
21 demonstrate the potential for auditory training to partially restore temporal processing in older  
22 listeners and highlight the role of cognitive function in these gains.

**Keywords:** Auditory Training, Aging, Speech Perception, Auditory steady-state response

23 **Introduction**

24           The brain’s ability to process the temporal characteristics of auditory stimuli is an  
25 integral component of speech understanding, particularly in complex environments that reduce  
26 the redundancy of the speech signal. For example, the ability to discriminate between changes in  
27 temporal rate contributes to the listener’s ability to discriminate fundamental frequency to cue  
28 speaker and gender identification, an important cue that supports speech segregation and speech  
29 understanding in noise. Previous studies have demonstrated age-related declines in rate  
30 discrimination (Gaskins et al. 2019) and in other temporal processing tasks (Fitzgibbons and  
31 Gordon-Salant 2011; Pichora-Fuller et al. 2007; Roque et al. 2019a). Therefore, temporal  
32 processing deficits may underlie older adults’ reported difficulties when communicating in  
33 challenging listening situations, and the question remains whether these age-related deficits can  
34 be improved through targeted auditory training.

35           Animal and human studies suggest that the brain retains some plasticity into older age;  
36 therefore, training that targets temporal tasks may improve perceptual performance and neural  
37 processing in the older listener. Age-related decreases in rat temporal coding and cortical firing  
38 synchrony can largely be reversed by training on a frequency discrimination auditory training  
39 paradigm (de Villers-Sidani et al. 2010). A cross-species study (mice and humans) found that  
40 adaptive training on signal-in-noise detection in a closed-loop paradigm led to improvements in  
41 signal detection in both species and generalization to speech-in-noise performance in human  
42 listeners (Whitton et al. 2017). Finally, a training study with older listeners, both with and  
43 without hearing loss, found that auditory-cognitive training led to reductions in latencies of the  
44 frequency-following response, an indication of improved temporal precision (Anderson et al.  
45 2013). This training presented stimuli that adaptively increased or decreased both consonant-

46 transition durations and auditory memory load. Overall, these studies demonstrate the potential  
47 for training-related neuroplasticity in older listeners.

48         The time course of perceptual learning and generalization to untrained stimuli has been  
49 compared across older and younger listeners (Manheim et al. 2018; Sabin et al. 2013). For  
50 example, Sabin et al. (2013) found differing learning patterns in older and younger listeners on a  
51 spectral modulation detection training task. Young listeners improved in their ability to detect  
52 spectral modulations, but this training effect did not generalize to an untrained spectral  
53 modulation frequency. In contrast, older listeners showed more modest and gradual improvement  
54 in performance throughout the training sessions that generalized to an untrained frequency. The  
55 authors surmised that a prolonged consolidation phase that stabilizes task learning may have  
56 facilitated this generalization.

57         Previous studies demonstrated improvement in rate discrimination thresholds in cochlear-  
58 implant listeners across a wide range of ages (Bissmeyer et al. 2020; Goldsworthy and Shannon  
59 2014). However, it is currently unknown whether targeted auditory training can improve  
60 temporal rate discrimination ability in older acoustic normal-hearing listeners or hearing-  
61 impaired listeners, and whether improvement in temporal rate discrimination generalizes to  
62 performance on other temporal processing and speech understanding measures. The current  
63 study was designed to: 1) determine whether rate discrimination training can improve auditory  
64 temporal processing in older and younger listeners in both perceptual and in neural responses, 2)  
65 determine the extent to which perceptual learning on rate discrimination generalizes to other  
66 temporal processing tasks and measures of speech understanding, and 3) investigate the neural  
67 and cognitive variables that are associated with training-related improvements in perception.  
68 Based on previous animal and human studies, we hypothesized that perceptual training would

69 partially restore temporal processing in older listeners. Furthermore, we hypothesized that neural  
70 responses to the trained pulse trains (auditory steady-state responses) and cognitive ability would  
71 relate to changes in perception. Finally, given that previous studies have not shown significant  
72 effects of hearing loss on temporal processing tasks (Fitzgibbons and Gordon-Salant 1996;  
73 Roque et al. 2019a), we hypothesized a similar training benefit regardless of hearing status.

## 74 **Materials and Methods**

### 75 *Listeners*

76 We recruited 301 listeners for a double-blind randomized controlled clinical trial and  
77 evaluated them to determine if they met the following audiometric criteria for these groups:  
78 young normal hearing (YNH, age 18-30 yrs), older normal hearing (ONH, age 65-85 yrs), and  
79 older hearing impaired (OHI, age 68-85 yrs). Normal hearing was defined as pure-tone  
80 thresholds  $\leq 25$  dB HL (re: ANSI, 2018) from 125 to 4000 Hz in the right ear and impaired  
81 hearing was defined by a high-frequency pure-tone average (average thresholds at 1, 2, and 4  
82 kHz)  $> 30$  dB HL and thresholds at 2 and 4 kHz  $< 70$  dB HL (to ensure signal audibility). In all  
83 three listener groups, hearing thresholds were symmetrical (no interaural differences  $> 10$  dB at  
84 any frequency), and there were no air-bone gaps  $> 10$  dB at any frequency. Word recognition  
85 scores were  $> 70\%$  bilaterally, using 25-word lists of the NU-6 test (Tillman and Carhart 1966)  
86 presented at 75 dB HL in quiet. Middle ear function was normal bilaterally based on age values  
87 for tympanometric peak pressure, peak admittance, tympanometric width, and equivalent  
88 volume; acoustic reflexes were present from 500-2000 Hz, elicited ipsilaterally and  
89 contralaterally. Finally, auditory brainstem responses (ABRs) were recorded, and Wave V  
90 latencies were  $< 6.8$  ms with no interaural asymmetries  $> 0.2$  ms. Additional criteria included the  
91 following: A passing score of  $\geq 26$  on the Montreal Cognitive Assessment (MoCA; Nasreddine

92 et al. 2005), a negative history of neurological disease, a passing score on the Snellen vision  
93 screening chart  $\leq 20/50$  (Hetherington 1954), being a native English speaker, and earning a high  
94 school diploma. All procedures were reviewed and approved by the Institutional Review Board  
95 (IRB) at the University of Maryland, College Park. Participants provided informed consent and  
96 were monetarily compensated for their time.

97         The 125 listeners who met the study criteria were randomly assigned to one of two  
98 training groups: experimental and active control. Of these, 48 listeners did not complete the  
99 study. Seventeen listeners were dismissed due to: non-compliance with training (3), poor quality  
100 data (7), adverse event (1), and excessive time delay associated with COVID-19 (6). Twenty-six  
101 listeners withdrew from the study due to medical or transportation issues. Eleven listeners were  
102 lost to follow-up. The final numbers of listeners in each training group were 40 Experimental (14  
103 YNH, 16 ONH, and 10 OHI; 30 Females) and 37 Active Control (15 YNH, 14 ONH, and 8 OHI;  
104 28 Females). See Table 1 for additional demographic characteristics. Note that across  
105 measurements, 1% of listener data (31 of 2618 measurements) are missing because of isolated  
106 issues during data collection or because of anomalous data that did not converge.

### 107 *Pre- and Post-Testing*

108         Both training groups were tested using the same battery of electrophysiologic and  
109 behavioral measures prior to the onset and after completion of training. Auditory steady-state  
110 responses (ASSRs) were recorded to 100-, 200-, 300- and 400-Hz bandpass-filtered click trains,  
111 and behavioral pulse-rate discrimination was measured to the same stimuli. The behavioral test  
112 battery also included generalization measures: gap detection, gap duration discrimination, tempo

113 discrimination, and several speech recognition measures. These measures will be described in  
114 more detail below.

115 *Procedure.* Listeners were seated in a double-walled sound-attenuating booth. The stimuli were  
116 presented to listeners through a single insert earphone (ER-2, Etymotic, Elk Grove Village, IL).  
117 Stimulus presentation and event timing were controlled from a laptop computer and a custom  
118 MATLAB script.

### 119 *Perceptual and Neural Responses to Pulse Trains*

120 *Stimuli.* The stimuli were band-limited pulse trains (300-ms duration) having rates of 100, 200,  
121 300, and 400 Hz. The pulses had a 1-kHz bandwidth arithmetically centered around 4 kHz,  
122 created using forward-backward Butterworth filters (5<sup>th</sup> order) (Gaskins et al. 2019). Raised  
123 cosine Hanning windows with a 10-ms rise-fall time were applied to the stimuli to avoid filter-  
124 related onset and offset transients. The stimuli were presented monaurally to the right ear at 75  
125 dBA for all neural and non-speech perceptual measures described below. For perceptual testing  
126 only, a low-frequency masking noise was mixed with the pulse train stimuli to eliminate the use  
127 of low-frequency distortion products to perform the task. Wideband masking noise was low-pass  
128 filtered using a 200-Hz cutoff with a -3 dB/octave filter and presented at an overall level of 61  
129 dB SPL.

### 130 *Perceptual Rate Discrimination*

131 Rate discrimination for each reference pulse rate was assessed by measuring pulse-rate  
132 difference limens (DLs) using a three-interval, two-alternative forced choice (3I-2AFC)

133 procedure. Each rate (100, 200, 300, and 400 Hz) was tested with three blocks of 60 trials for a  
134 total of 720 trials across blocks. The order of reference pulse rate was randomized.

135 The listeners viewed a monitor that displayed four boxes. Stimulus presentation was self-  
136 paced throughout the experiment. They were asked to click the box containing “Begin Trial” and  
137 then heard a sequence of three stimuli, with the presentation of each stimulus synchronized to a  
138 flash in the corresponding visual block in the sequence. The first stimulus was always the  
139 reference stimulus. The target stimulus with the higher rate was in the second or third interval,  
140 randomly chosen with a 50% a priori probability.

141 The listeners received the following instructions: “You will hear three brief sounds that  
142 sound like a buzz. The first one is the ‘standard.’ One of the other sounds has a slightly higher  
143 pitch that sounds different from the standard sound. Please select the sound, 2 or 3, that contains  
144 the higher pitch (or sounds different from the standard sound). If you are not sure, take a guess.”

145 After each listener response, correct answer feedback was provided by flashing a green  
146 light at the box corresponding to the correct interval. A 2-down-1-up adaptive procedure was  
147 employed to target 70.7% correct on the psychometric function (Levitt 1971). The initial rate  
148 difference between the reference and target stimulus was set at 40%. The maximum allowable  
149 rate difference was 40% and the minimum allowable rate difference was 0% (i.e., adaptive tracks  
150 could not go below the reference rate). The adaptation step size was then decreased by a factor of  
151 2 until the listener reached three reversals, after which the step size decreased by a factor of  $\sqrt{2}$ .

152 *Analysis.* Perceptual responses were recorded in MATLAB. The pulse rate difference limen (DL)  
153 in percent for an individual adaptive track was found by calculating the geometric mean over all  
154 of the reversals in the adaptive procedure except the first two. The arithmetic mean of the second



155 and third tracks was used to calculate the final DL for each listener and condition. The first track  
156 was omitted to decrease the effects of learning from the first track. The DLs were log-  
157 transformed due to a negative skew in the data prior to conducting the statistical analysis.

#### 158 *ASSR*

159 *Recording.* The pulse trains were presented at a rate of 1.66 Hz using the Intelligent Hearing  
160 Systems Continuous Acquisition Model (IHS SEPCAM, Miami, FL) through  
161 electromagnetically shielded insert ER-3 earphones (IHS) in an electrically shielded double-  
162 walled sound-attenuating booth. A three-electrode vertical montage was used (Cz active, right  
163 ear lobe reference, low forehead ground). Responses were recorded with a 10-kHz sampling rate  
164 and were filtered from 1 to 5 kHz on-line. A minimum of 1024 artifact-free sweeps ( $\leq 30 \mu\text{V}$ )  
165 were obtained for each condition. The listeners watched their movie of choice, muted with  
166 subtitles, to facilitate a relaxed but awake state.

167 *Data Analysis.* Responses were imported into MATLAB format using the `pop_biosig` function  
168 from EEGLAB (Delorme and Makeig 2004) and filtered from 50-500 Hz. An individual average  
169 response was created with the first 1000 artifact-free sweeps. Phase-locking factor (PLF) was  
170 assessed in a manner similar to that employed in previous studies (Jenkins et al. 2018; Roque et  
171 al. 2019b), using Morlet wavelets to decompose the signal from 50-500 Hz (Tallon-Baudry et al.  
172 1996). The PLF value was then calculated for the response time region of 10-310 ms and around  
173 a 20-Hz frequency bin corresponding to the pulse-rate of each condition. The PLFs were log-  
174 transformed due to a negative skew in the data.

175

176 *Gap Detection*

177           Gap detection thresholds were measured using target stimuli that were 250-ms wideband  
178 Gaussian noise bursts that had a silent gap temporally centered in the stimulus. Cosine squared  
179 windows with a 1-ms rise-fall time were applied to the stimuli to avoid transients.

180           A 3I-2AFC procedure was used. The first interval was the standard, with no gap. The  
181 target stimulus with the silent gap was in the second or third interval, randomly chosen with a  
182 50% *a priori* probability.

183           The listeners received the following instructions, “This is the ‘standard’ and is a  
184 continuous noise. One of the other noise bursts, 2 or 3, has a very brief pause or interruption that  
185 sounds different from the standard noise burst. Please select the noise burst, 2 or 3, that contains  
186 the brief pause (or sounds different from the standard tone pair). If you are not sure, take a  
187 guess.”

188           After each listener response, correct answer feedback was provided. Then the gap  
189 duration was adapted according to the 2-down-1-up adaptive rule, targeting 70.7% correct  
190 discrimination. The initial gap duration was 25 ms. The maximum gap duration was 100 ms and  
191 the minimum gap duration was 1 ms. The initial step size in the adaptive procedure was 5 ms.  
192 After two reversals, the step size was changed to 1 ms. The adaptive track continued until there  
193 were eight reversals. Threshold was defined as the arithmetic mean of the last six reversals.  
194 Three adaptive tracks were conducted. The arithmetic mean of the second and third tracks was  
195 used to calculate the gap detection threshold for each listener.

196 *Gap Duration Discrimination*

197           Gap duration discrimination was measured using 250-ms 1000-Hz tone pairs separated  
198 by a silent interval (Fitzgibbons and Gordon-Salant 1994). Cosine squared windows with a 5-ms  
199 rise-fall time were applied to the stimuli to avoid transients.

200           The listener received the following instruction: “Please select the tone pair, 2 or 3, that  
201 contains the longer silent interval (or sounds different from the standard tone pair). If you are not  
202 sure, take a guess.”

203           After each listener response, correct answer feedback was provided. Then the gap  
204 duration was adapted according to the 2-down-1-up adaptive rule. The initial gap duration for the  
205 target was 350 ms (i.e., 40% larger than the reference gap of 250 ms). The maximum gap  
206 duration was 450 ms and the minimum gap duration was 252 ms. The initial step size in the  
207 adaptive procedure was 10 ms. After two reversals, the step size was reduced to 2 ms. The  
208 adaptive track continued until there were eight reversals. The relative duration discrimination DL  
209 in percent (based on the 250-ms reference) was calculated from the arithmetic mean of the last  
210 six reversals. Three adaptive tracks were measured. The arithmetic mean of the second and third  
211 tracks was used to calculate the gap duration discrimination DL for each listener.

### 212 *Tempo (Rhythm) Discrimination*

213           Discrimination DLs were measured for inter-onset intervals (IOIs) in isochronous  
214 sequences of five brief 50-ms 1000-ms tones (see Fitzgibbons and Gordon-Salant 2001). The IOI  
215 is defined as the duration between the onset of one tone in the sequence and the onset of the  
216 subsequent tone. Cosine squared windows with a 5-ms rise-fall time were applied to the stimuli  
217 to avoid transients.

218 A 3I-2AFC procedure was used. The reference intervals had a fixed IOI, either 100 ms  
219 (fast reference) or 600 ms (slow reference). The target stimulus with the relatively slower tone  
220 sequence was in the second or third interval, randomly chosen with a 50% *a priori* probability.

221 The listeners received the following instructions: “You will hear three sequences of 5  
222 brief tones. The first sequence is the ‘standard.’ One of the other sequences, 2 or 3, sounds  
223 slower than the standard sequence. Please select the tone sequence, 2 or 3, that is a slower  
224 sequence (or sounds different from the standard sequence). If you are not sure, take a guess.”

225 After each listener response, correct answer feedback was provided. Then the IOI was  
226 adapted according to the 2-down-1-up adaptive rule. The starting target IOI was 150 ms for the  
227 100-ms reference IOI and 700 ms for the 600-ms reference IOI. The maximum target IOI was  
228 200 and the minimum target IOI was 101 ms for the 100-ms reference IOI; the maximum target  
229 IOI was 800 and the minimum target IOI was 601 ms for the 600-ms reference IOI. The initial  
230 step size in the adaptive procedure was 10 ms. After two reversals, the step size decreased to 2  
231 ms. The adaptive track continued until there were eight reversals. The DL for each IOI was  
232 calculated from the arithmetic mean of the last six reversals of each track. Three adaptive tracks  
233 were conducted for each reference IOI (i.e., there were six separate adaptive tracks). The  
234 arithmetic mean of the second and third tracks was used to calculate the relative IOI DL in  
235 percent (based on either the 100-ms or 600-ms IOI reference) for each listener.

### 236 *Sentence Recognition*

237 Sentence recognition in quiet was measured for sentences from the IEEE corpus (IEEE  
238 1969) in five conditions: normal rate with no reverberation, two levels of time compression (40%  
239 and 60%) and two levels of reverberation (0.6 s and 1.2 s). There were 10 sentences presented in

240 each condition. Each sentence was preceded by a carrier phrase, “Number 1,” “Number 2,” etc.  
241 Listeners were instructed to repeat the sentence they heard. The experimenter scored which of  
242 the five key words in each sentence were repeated correctly, and the percent correct keywords  
243 words out of 50 was calculated for each condition.

#### 244 *Training*

245 *Experimental.* Listeners received in-lab perceptual rate-discrimination training for two rates, 100  
246 and 300 Hz, using a procedure similar to that described above for rate discrimination assessment.  
247 The training was blocked by rate, with four blocks of 60 trials for each rate for a total of 480  
248 trials. Correct-answer feedback was provided after each trial throughout the training sessions.  
249 Nine sessions of this training took place in the sound-attenuating booth over the course of two to  
250 three weeks.

251 *Active Control.* Listeners received in-lab training on tone-in-noise detection, using a 3I-2AFC  
252 procedure. A notched-noise paradigm and simultaneous masking were used to measure filter  
253 bandwidths (Desloge et al., 2012), using a 300-ms 1-kHz stimulus tone and a 500-ms white  
254 Gaussian noise (0.25-6 kHz). The target tone was temporally centered in the noise. Cosine  
255 squared windows with a 10-ms rise-fall time were applied to the noise and target tones to avoid  
256 transients. The noise level was fixed at 75 dBA and the tone level varied adaptively to determine  
257 threshold in three notch bandwidths: 90, 120, and 150 Hz.

258 After each listener response, correct answer feedback was provided. Then the tone level  
259 was adapted according to the 2-down-1-up adaptive rule. The initial target tone level was 75  
260 dBA. The maximum target tone level was 75 dBA and the minimum target tone level was -20  
261 dBA. The initial step size in the adaptive procedure was 3 dB. After three reversals, the step size

262 decreased to 0.5 dB. Each of the three notch bandwidth conditions was presented in four blocks,  
263 with 40 trials per block, for a total of 480 trials; therefore, the procedure had the same number of  
264 trials when compared to the pulse-rate discrimination training, except that the task was different.  
265 Nine sessions of this training took place in the sound-attenuating booth over the course of two to  
266 three weeks. The masked threshold in dB for an individual adaptive track was found by  
267 calculating the arithmetic mean over the last four reversals in the adaptive track. The arithmetic  
268 mean of the second and third tracks was used to calculate the final masked threshold for each  
269 listener and condition.

#### 270 *Cognitive Testing*

271 Assessments from the National Institutes of Health (NIH) Cognition Toolbox (Weintraub  
272 et al. 2013) were used to determine if particular cognitive skills predicted perceptual training  
273 benefits. These tests included the List Sorting Working Memory Test, the Flanker Inhibitory  
274 Control and Attention Test, the Pattern Comparison Processing Speed Test, and the Dimensional  
275 Card Sort Test. The tests were administered using the NIH toolbox application on an Apple iPad  
276 (Apple, Inc., Cupertino, CA). The uncorrected standardized scores were downloaded from the  
277 application.

#### 278 *Statistical Analysis*

##### 279 *Pulse Rate Discrimination Improvement and Near Generalization*

280 A four-way repeated measures analyses of variance (RMANOVA) was conducted to  
281 evaluate the effects of training on perception and neural representation of the 100- and 300-Hz  
282 pulse trains, comparing pre-test and post-test measures. There were two between group-variables  
283 (listener group and training group) and two within-group variables (rate: 100 and 300 Hz;

284 session: pre-test vs. post-test). The dependent variable was pulse-rate DL for perceptual testing.  
285 A separate four-way RMANOVA was performed with the dependent variable PLF for the ASSR.  
286 To assess near generalization to untrained rates (200 and 400 Hz), two separate four-way  
287 RMANOVAs were conducted for perceptual testing and ASSR using the same variables. To  
288 account for differences in learning stemming from pre-test performance (Sabin et al. 2013), we  
289 conducted a one-way repeated-measures analysis of covariance (RMANCOVA) using post-test  
290 100- and 300-Hz DLs as the dependent variables and the pre-test 100- and 300-Hz DLs as  
291 covariates. In addition, multivariate ANOVAs were conducted to assess differences between  
292 post-testing rate discrimination in the older listeners with pre-testing rate discrimination in the  
293 YNH listeners to determine if training restores temporal processing deficits in the ONH listeners.  
294 Bonferroni-corrected independent-samples t tests and paired-samples t tests (assuming equal  
295 variance) were used to perform post hoc analyses when main effects or interactions were  
296 observed.

### 297 *Mid Generalization*

298 Separate three-way RMANOVAs were conducted to evaluate mid generalization to the  
299 other temporal processing measures as follows, using the same between-group variables (listener  
300 group and training group) as for the pulse trains and the same within-subject variable of session  
301 (pre-test and post-test). Dependent variables for two of the measurements were gap detection  
302 threshold and gap duration discrimination DL. For the tempo discrimination experiment, the  
303 dependent variable was IOI discrimination DL. In addition, there was an additional within-group  
304 variable (reference IOI: 100 and 600 ms), making this a four-way RMANOVA.

305

306 *Far Generalization*

307           A RMANOVA was conducted to evaluate generalization to sentence recognition  
308 measures using the same between-group variables. The one within-group variable was condition  
309 (Clean speech, two levels of time compression, and two levels of reverberation), and the other  
310 was test time (pre-test, post-test). The dependent variable was the sentence recognition score.  
311 The percent scores were transformed using the rationalized arcsine (rau) transform proposed by  
312 Studebaker (1985) to avoid violation of the homogeneity of variance assumption required for an  
313 ANOVA.

314 *Performance Predictors*

315           A step-wise multiple linear regression was conducted to identify the potential factors that  
316 contributed to changes in pulse-rate discrimination performance for 100- and 300-Hz rates in the  
317 experimental group. The dependent variable was the average change in rate DL (post - pre) for  
318 100- and 300-Hz reference rates. Processing speed was included as an independent variable due  
319 to its relationship to pre-test DLs (Gaskins et al. 2019). Additional cognitive measures included  
320 in the analyses were working memory, the Dimensional Card Sort (cognitive flexibility), and the  
321 Flanker (attention and inhibitory control). The PTA in the right ear (500 to 4000 Hz) was also  
322 included to determine the contribution of audibility to performance. A log transform was used to  
323 normalize the skewed PTA distribution. Finally, to determine the contributions of subcortical  
324 neural processing to performance changes, the pre-test PLF and change in PLF averaged for 100-  
325 and 300-Hz rates were included.

326



327 **Results**

328 *Trained rates (100 and 300 Hz).* Figure 1 displays pre- and post-test performances for the 100-  
329 and 300-Hz reference rates in YNH, ONH, and OHI listeners. The RMANOVA showed a main  
330 effect of session ( $F_{(1,69)} = 59.33, P < 0.001, \eta^2 = 0.42$ ), such that DLs were lower (better) at the  
331 post-test compared to the pre-test. There was a significant training group  $\times$  session interaction  
332 ( $F_{(1,69)} = 5.48, P = 0.022, \eta^2 = 0.04$ ), There was a main effect of session in both the experimental  
333 group ( $F_{(1,37)} = 39.20, P < 0.001, \eta^2 = 0.51$ ) and the active control group ( $F_{(1,35)} = 22.63, P < 0.001$   
334  $\eta^2 = 0.35$ ), but a larger effect size and more pronounced DL decreases were noted in the  
335 experimental group (100 Hz: 56%; 300 Hz: 86%) than in the active control group (100 Hz: 19%;  
336 300 Hz: 56%). Therefore, although there was a procedural learning effect in both groups, the  
337 interaction between the training groups suggests additional perceptual learning in the  
338 experimental group that exceeded the procedural learning effect. The training group  $\times$  listener  
339 group  $\times$  session interaction was not significant ( $F_{(2,69)} = 1.38, P = 0.258, \eta^2 = 0.02$ ), suggesting  
340 that training effects on rate discrimination did not differ significantly by listener group. A  
341 RMANCOVA using post-test 100- and 300-Hz DLs as the dependent variables and the pre-test  
342 100- and 300-Hz DLs as covariates confirmed greater effects of training (lower post-training  
343 DLs) in the experimental group than in the active control group ( $F_{(1,71)} = 9.59, P = 0.003, \eta^2 =$   
344  $0.08$ ).

345 There was also a significant effect of rate ( $F_{(1,69)} = 35.74, p < 0.001, \eta^2 = 0.26$ ), because  
346 there were lower DLs for the 300- compared to the 100-Hz rate. There was a main effect of  
347 listener group ( $F_{(2,69)} = 23.53, P < 0.001, \eta^2 = 0.39$ ), such that the YNH listeners had lower DLs  
348 than the ONH ( $P < 0.001$ ) and OHI ( $p < 0.001$ ) listeners, but the ONH and OHI listeners did not  
349 significantly differ ( $P = 0.087$ ). In addition, there was a significant listener group  $\times$  rate

350 interaction ( $F_{(2,69)} = 17.03, P < 0.001, \eta^2 = 0.24$ ). There was a significant listener group difference  
351 for the 300-Hz rate ( $F_{(2,71)} = 7.12, P = 0.002, \eta^2 = 0.17$ ) but not for the 100-Hz rate ( $F_{(2,72)} = 0.91,$   
352  $P = 0.408, \eta^2 = 0.03$ ).

353 *Untrained rates (200 and 400 Hz)*. Figure 2 displays pre-test and post-test performance for the  
354 200- and 400-Hz pulse rates in YNH, ONH, and OHI listeners. The RMANOVA showed a main  
355 effect of session ( $F_{(1,70)} = 21.24, P < 0.001, \eta^2 = 0.19$ ), such that DLs were lower at the post-test  
356 compared to the pre-test. There was a significant training group  $\times$  session interaction ( $F_{(1,70)} =$   
357  $8.01, P = 0.006, \eta^2 = 0.07$ ). There was a significant main effect of session in the experimental  
358 group ( $F_{(1,37)} = 21.48, P < 0.001, \eta^2 = 0.33$ ) that was not present in the active control group ( $F_{(1,35)}$   
359  $= 2.59, P = 0.117, \eta^2 = 0.06$ ). The training group  $\times$  listener group  $\times$  session interaction was not  
360 significant ( $F_{(2,70)} = 0.28, P = 0.754, \eta^2 = 0.005$ ), suggesting that training effects on rate  
361 discrimination did not differ significantly by listener group. A RMANCOVA using post-test  
362 200- and 400-Hz DLs as the dependent variables and the pre-test 200- and 400-Hz DLs as  
363 covariates confirmed greater effects of training (lower post-training DLs) in the experimental  
364 group than in the active control group ( $F_{(1,68)} = 13.53, P < 0.001, \eta^2 = 0.10$ ).

365 The RMANOVA showed a significant effect of rate ( $F_{(1,69)} = 29.45, P < 0.001, \eta^2 = 0.25$ )  
366 associated with lower DLs for the 400-Hz rate than the 200-Hz rate. There was a main effect of  
367 listener group ( $F_{(2,69)} = 28.70, P < 0.001, \eta^2 = 0.41$ ), such that the YNH listeners had lower DLs  
368 than the ONH ( $P < 0.001$ ) and OHI ( $P < 0.001$ ) listeners, and the ONH listeners had lower DLs  
369 than the OHI listeners ( $P = 0.039$ ). The rate  $\times$  listener group interaction was also significant  
370 ( $F_{(2,70)} = 6.45, P = 0.003, \eta^2 = 0.11$ ), driven by larger listener group differences for the 400-Hz  
371 rate compared to the 200-Hz rate.

372 A multivariate analysis of variance (MANOVA) was then used to compare the post-test  
373 DLs in the ONH and OHI listeners to the pre-test DLs in the YNH listeners in the experimental  
374 training group for the four different rates (Figure 3). At the pre-test, there was a main effect of  
375 listener group ( $F_{(2,36)} = 14.28, P < 0.001, \eta^2 = 0.44$ ); both groups of older listeners had higher  
376 (poorer) DLs than the YNH listeners ( $P < 0.001$ ), but the older groups did not differ from each  
377 other ( $P > 0.99$ ). A comparison of the pre-test YNH DLs with the post-test DLs in ONH and  
378 OHI listeners showed a main effect of listener group ( $F_{(2,37)} = 8.29, P = 0.001, \eta^2 = 0.31$ ), but post  
379 hoc t tests showed that the DLs of ONH listeners did not differ from those of YNH listeners ( $p =$   
380  $0.426$ ), while the OHI listeners had higher DLs than both the ONH ( $p = 0.025$ ) and the YNH ( $p$   
381  $< 0.001$ ) listeners. There was also a rate  $\times$  listener group interaction ( $F_{(6,111)} = 4.68, P < 0.001, \eta^2$   
382  $= 0.13$ ). At the 100-Hz rate, there were no significant differences among the three listener groups  
383 ( $P = 0.18$ ). At the 200-, 300-, and 400-Hz rates, there was no significant difference between the  
384 YNH and ONH listeners ( $P > 0.05$ ), but the OHI listeners had higher DLs than the YNH listeners  
385 ( $P < 0.05$ ). Given that pre-test DL differences existed between the ONH and YNH listeners ( $P <$   
386  $0.001$ ), these results demonstrate that training on rate discrimination at least partially restored  
387 temporal processing abilities on this measure in ONH listeners.

### 388 ASSR

389 *Trained rates (100 and 300 Hz).* Figure 4 displays pre- and post-training box plots and average  
390 PLFs for the 100- and 300-Hz rates measured from the YNH, ONH, and OHI listeners. The  
391 RMANOVA showed a training group  $\times$  session interaction ( $F_{(1,69)} = 6.63, P = 0.012, \eta^2 = 0.08$ ),  
392 driven by a significant increase in PLF in the experimental group ( $F_{(1,35)} = 5.14, P = 0.03, \eta^2 =$   
393  $0.11$ ) that was not observed in the active control group ( $F_{(1,34)} = 2.01, P = 0.165, \eta^2 = 0.05$ ). The  
394 training group  $\times$  listener group  $\times$  session interaction was not significant ( $F_{(1,69)} = 0.09, P = 0.916$ ,

395  $\eta^2 = 0.002$ ), suggesting that training effects on PLF did not differ by listener group. To account  
396 for differences in neuroplasticity effects stemming from pre-test performance, we conducted a  
397 RMANCOVA using post-test 100- and 300-Hz PLFs as the dependent variables and the pre-test  
398 100- and 300-Hz PLFs as covariates and confirmed greater effects of training (higher post-  
399 training PLFs) in the experimental group than in the active control group ( $F_{(1,68)} = 8.89$ ,  $P =$   
400  $0.004$ ,  $\eta^2 = 0.079$ ).

401 The RMANOVA showed a significant effect of rate ( $F_{(1,69)} = 82.49$ ,  $P < 0.001$ ,  $\eta^2 = 0.51$ )  
402 associated with higher PLFs for the 100-Hz rate than the 300-Hz rate. There was no main effect  
403 of listener group ( $F_{(2,69)} = 1.67$ ,  $P = 0.195$ ,  $\eta^2 = 0.04$ ), but there was a significant listener group  $\times$   
404 rate interaction ( $F_{(2,69)} = 4.10$ ,  $P = 0.021$ ,  $\eta^2 = 0.05$ ). There was no significant listener group  
405 difference for the 100-Hz PLF ( $F_{(2,73)} = 0.85$ ,  $P = 0.431$ ,  $\eta^2 = 0.02$ ), but there was a significant  
406 group difference for the 300-Hz PLF ( $F_{(2,72)} = 6.86$ ,  $P = 0.002$ ,  $\eta^2 = 0.16$ ). Post hoc t tests showed  
407 that the YNH group had higher PLFs than the ONH group ( $P = 0.002$ ), but the group difference  
408 was not significant between the YNH and OHI groups ( $P = 0.057$ ) nor between the ONH and  
409 OHI groups ( $P = 0.866$ ).

410 *Untrained rates (200 and 400 Hz).* Figure 5 displays pre- and post-training box plots and average  
411 PLFs for the 200- and 400-Hz rates for the YNH, ONH, and OHI listeners. The RMANOVA  
412 showed that the training group  $\times$  session interaction was not significant ( $F_{(1,68)} = 0.99$ ,  $P = 0.356$ ,  
413  $\eta^2 = 0.01$ ) and there was no main effect of session ( $F_{(1,68)} = 0.002$ ,  $P = 0.96$ ,  $\eta^2 < 0.001$ ),  
414 suggesting that training effects on PLF did not generalize to untrained rates.

415 There was a significant effect of rate ( $F_{(1,68)} = 25.30$ ,  $P < 0.001$ ,  $\eta^2 = 0.25$ ) associated with  
416 higher PLF for the 200-Hz rate than the 400-Hz rate. There was a main effect of listener group

417 ( $F_{(2,68)} = 15.16, P < 0.001, \eta^2 = 0.28$ ), such that the YNH listeners had higher PLFs than either the  
418 ONH ( $p < 0.001$ ) or OHI ( $P < 0.001$ ) listeners, but there were no significant differences between  
419 the ONH and OHI listeners ( $P = 1.00$ ). In addition, there was a significant listener group  $\times$  rate  
420 interaction ( $F_{(2,68)} = 3.34, P = 0.04, \eta^2 = 0.07$ ), driven by larger listener group differences for the  
421 200-Hz than for the 400-Hz rate.

#### 422 *Mid Generalization – Temporal Processing*

##### 423 *Gap Detection and Gap Duration Discrimination*

424 Figure 6 displays pre- and post-training box plots and individual datapoints for the gap detection  
425 and gap duration discrimination tasks in YNH, ONH, and OHI listeners.

426 Gap detection: The RMANOVA showed that there was a main effect of session ( $F_{(1,70)} = 5.41, P$   
427  $= 0.023, \eta^2 = 0.01$ ), but there was no training group  $\times$  session interaction ( $F_{(1,70)} = 0.09, P = 0.77,$   
428  $\eta^2 < 0.01$ ). There was no main effect of listener group ( $F_{(2,70)} = 1.51, P = 0.29, \eta^2 = 0.03$ ).

429 Gap duration discrimination: The RMANOVA showed a main effect of session ( $F_{(1,69)} = 7.00, P =$   
430  $0.01, \eta^2 = 0.01$ ), but there was no training group  $\times$  session interaction ( $F_{(1,69)} = 0.56, P = 0.46, \eta^2$   
431  $< 0.01$ ). There was no main effect of listener group ( $F_{(2,69)} = 0.29, P = 0.75, \eta^2 < 0.01$ ).

##### 432 *Tempo Discrimination*

433 Figure 7 displays pre- and post-training box plots and individual datapoints for relative DLs as a  
434 function of 100- and 600-ms IOIs in YNH, ONH, and OHI listeners.

435 The RMANOVA showed that there was no main effect of session ( $F_{(1,66)} = 1.10, P = 0.301, \eta^2 =$   
436  $0.02$ ) nor a training group  $\times$  session interaction ( $F_{(1,66)} = 0.02, P = 0.893, \eta^2 < 0.001$ ). There was no  
437 main effect of listener group ( $F_{(2,66)} = 0.36, P = 0.696, \eta^2 = 0.01$ ). There was a main effect of IOI

438 ( $F_{(1,66)} = 23.66, P < 0.001, \eta^2 = 0.23$ ); the relative DLs were smaller for the 600-ms IOI than for  
439 the 100-ms IOI. No other interactions were significant.

#### 440 *Speech Recognition*

441 Figures 8 and 9 display pre- and post-training speech recognition data in experimental  
442 and active control groups, respectively. The RMANOVA showed that there was no main effect  
443 of session ( $F_{(1,72)} = 1.10, P = 0.299, \eta^2 < 0.01$ ), nor a training group  $\times$  session interaction ( $F_{(1,71)} =$   
444  $0.77, P = 0.381, \eta^2 < 0.01$ ), suggesting that sentence recognition did not improve across groups.  
445 There was a main effect of listener group ( $F_{(2,71)} = 60.03, P < 0.001, \eta^2 = 0.29$ ). Post hoc testing  
446 showed that the OHI listeners had poorer overall performance than the YNH and ONH listeners  
447 ( $P < 0.001$  for both), and ONH listeners had poorer overall performance than the YNH listeners  
448 ( $P = 0.008$ ). There was a significant measure  $\times$  listener group interaction ( $F_{(8,284)} = 44.82, P <$   
449  $0.001, \eta^2 = 0.08$ ). This interaction was driven by greater effects of time compression and  
450 reverberation on the performance of the OHI listeners than on that of the YNH or ONH listeners.  
451 Removal of the outlier in the OHI experimental group did not change these results.

#### 452 *Factors Contributing to Training-Induced Changes in Pulse Rate Discrimination*

453 The multiple linear regression collinearity diagnostics showed satisfactory tolerance  
454 (lowest 0.30) and variance inflation factor (highest 2.61) values, suggesting that the predictor  
455 variables were not highly correlated. One significant regression equation was returned; the  
456 Flanker score (attention) significantly predicted change in rate discrimination ( $F_{(1,35)} = 13.53, P <$   
457  $0.001$ ) with an  $R^2$  value of 0.29. None of the other variables contributed significantly to the  
458 change in rate discrimination. This model is summarized in Table 2.

## 459 **Discussion**

460           The overarching goal of this investigation was to determine the effect of rate  
461 discrimination training on temporal processing in older and younger listeners. The results  
462 showed training-related improvements in temporal rate discrimination DLs and phase locking,  
463 but improvement did not generalize to other temporal processing tasks or sentence recognition  
464 measures. A smaller degree of improvement in temporal rate discrimination DLs was also noted  
465 in the active control group, likely an effect of procedural learning (Koziol and Budding 2012).  
466 The training  $\times$  listening group interactions were not significant, suggesting that training effects  
467 were not specific to a specific listener group.

### 468 *Effects of Training in Older and Younger Listeners*

469           Although the magnitude of change in DL appeared to be greatest in the ONH listeners,  
470 there was no significant listener  $\times$  training group interaction, suggesting that training effects did  
471 not differ by age or hearing loss status (Fig. 1). These results appear to contrast with those of  
472 Sabin et al. (2013), who found differences in perceptual learning patterns between YNH and OHI  
473 listeners. The older listeners in the Sabin et al. study had mild to moderate hearing loss  
474 (thresholds ranging from 15 to 70 dB HL from 0.5 to 4 kHz), which may have affected their  
475 ability to benefit from training on spectrotemporal modulation due to decreased spectral  
476 resolution associated with hearing loss. Our study focused on a measure of temporal processing,  
477 an acoustic dimension that is less affected by hearing loss (Fitzgibbons and Gordon-Salant  
478 1996), and we did not find effects of hearing loss on pre-training rate discrimination.

479           One important finding of our study was the improvement in behavioral temporal  
480 processing with training to partially reduce age-related deficits. The ONH listeners' post-training

481 DLs decreased to levels that were approaching those of the YNH listeners' pre-training DLs  
482 (Fig. 3). These results are consistent with animal models of neuroplasticity in auditory aging that  
483 have shown that perceptual training can reduce or eliminate age-related deficits in temporal  
484 processing (de Villers-Sidani et al. 2010). However, we did not find a similar reduction of the  
485 age-related deficit in neural temporal processing. Significant group differences in the PLF (at  
486 rates > 100 Hz) at the pre-test session persisted at the post-test session. Our selection of rates was  
487 motivated to match testing between rate discrimination and the ASSR, and rates of 100-400 Hz  
488 arise from low to high brainstem sources (Herdman et al. 2002). The de Villers-Sidani study  
489 found changes in temporal precision in the rat auditory cortex, and therefore it is possible that a  
490 selection of a lower frequency rate (40 Hz or lower) that represents cortical sources would have  
491 shown an improvement in temporal precision.

## 492 *Generalization*

493 Rate discrimination. Generalization of training effects was limited to “near  
494 generalization;” in other words, to discrimination of the untrained 200- and 400-Hz rates (Fig. 2).  
495 Although the session × listener × training group interaction was not significant, the listener ×  
496 training group interaction was significant for ONH listeners ( $p = 0.04$ ), but not for the YNH or  
497 OHI listeners ( $p > 0.05$ ), suggesting that generalization was specific to the ONH listeners. The  
498 lack of generalization in the YNH listeners is consistent with previous studies that have found  
499 limited generalization effects for training on spectromodulation detection (Sabin et al. 2012) and  
500 amplitude-modulation detection (Fitzgerald and Wright 2011). Also, in YNH listeners, Wright et  
501 al. (2010) found that performance improved after two days of training (900 trials per day) on a  
502 temporal-interval discrimination task for a 1000-Hz tone pip and a 100-ms interval. Our training



503 entailed 240 trials on each of the trained rates per day, and even though training occurred over 9  
504 days, perhaps a greater number of trials per day is required to instill generalization in the YNH  
505 listeners. The spectromodulation detection task employed by Sabin et al. (2012) and Sabin et al.  
506 (2013) employed 720 trials during each training session. In older listeners, improvement in  
507 spectromodulation detection on the 2-cycles per octave trained condition generalized to the 1-  
508 cycle per octave untrained condition (Sabin et al. 2013). The authors observed that the most  
509 learning in YNH listeners occurred early in the training, but the ONH listeners exhibited a more  
510 prolonged time course of learning that may facilitate generalization. A similar phenomenon may  
511 underlie the generalization observed in ONH listeners in the current study.

512 ASSR. No generalization was found for untrained rates (200 and 400 Hz). The absence of  
513 generalization suggests two points: 1) the lack of increased PLF to 200- and 400-Hz rates  
514 suggests that the increase to 100- and 300-Hz rates is due to effects of training rather than to the  
515 effects of repeated testing, and 2) cortical neural processes may underlie generalization in  
516 perceptual performance, but the ASSR recordings in the current study targeted subcortical  
517 processing.

518 Generalization to other temporal processing and sentence recognition measures: No far  
519 generalization was observed for any of the temporal processing or sentence recognition  
520 measures. This is in contrast to other training studies employing temporally based training that  
521 have observed generalization to speech stimuli. For example, Lakshminarayanan and Tallal  
522 (2007) trained YNH listeners' perception of frequency-modulated (FM) sweeps that varied in  
523 direction of change, duration of FM sweep, and inter-stimulus interval between sweeps. They  
524 found that this training led to enhanced discrimination between syllables that differed in the  
525 onset of the second formant (/ba/ vs /da/), transition duration (/ba/ vs/ /wa/), and silence duration

526 (/sa/ vs /sta/). The transfer of temporally based training has also been observed in older listeners.  
527 Fostick et al. (2020) trained older listeners with normal to mild hearing loss levels on a spatial  
528 temporal order judgement task and found that improvement on this task generalized to  
529 recognition of word stimuli presented in quiet, narrowband noise, and wideband noise. They did  
530 not observe similar generalization for training on an intensity discrimination task. They  
531 interpreted these results as supporting the hypothesis that increased temporal processing ability  
532 leads to improvement in speech recognition.

533 Other training studies employing speech stimuli have observed generalization, and these  
534 effects vary depending on training parameters (Banai and Lavner 2019; Burk and Humes 2008;  
535 Karawani et al. 2015). Banai and Lavner (2019) trained young listeners to recognize time-  
536 compressed sentences under several different listening protocols that varied by stimulus set size,  
537 training schedule (trials presented in one training session vs. several sessions), and training  
538 duration. They found that all protocols led to improvement on the trained task and generalization  
539 to untrained tasks (new talker or sentences), but training over several sessions was the only  
540 protocol that led to generalization to new untrained sentences. The authors concluded that  
541 distributed training provides multiple opportunities to consolidate learning. Therefore, the use of  
542 speech rather than non-speech stimuli (as in the current study) may provide more opportunities  
543 for consolidation of learning due to the possibility of encountering similar stimuli in the natural  
544 environment.

#### 545 *Factors that Contribute to Perceptual Learning*

546 The Flanker score was the only variable that contributed significantly to change in rate  
547 discrimination from pre-test to post-test. Individuals with better response inhibition/attention

548 experience greater decreases in relative DLs following training. We had initially hypothesized  
549 that both cognitive and ASSR measures would relate to changes in rate discrimination. This  
550 hypothesis was based in part on the results of Gaskins et al. (2019), who found that both  
551 processing speed and ASSR spectral energy predicted 400-Hz rate discrimination. The current  
552 study found relationships among all of the cognitive variables and the pre-test relative DLs ( $r^2$   
553 values ranging from 0.14 to 0.37), but not among the pre-test ASSR PLFs and relative DLs (no  $r^2$   
554 value higher than 0.10). Overall, the current results suggest that cognitive function could be an  
555 important factor in the potential for improvement in temporal processing ability, at least with  
556 respect to rate discrimination. We note that the relatively high rates used in the current study  
557 arise from brainstem sources (Herdman et al. 2002). Perhaps the inclusion of a lower rate  
558 emanating from the cortex (e.g.,  $\leq 40$  Hz) would reveal a relationship between ASSR PLF and  
559 perceptual change due to the likelihood that cortical sources may be more highly influenced by  
560 top-down cognitive influences.

## 561 *Conclusion*

562 The current results suggest that perceptual training improves rate discrimination across  
563 listeners and can partially restore behavioral auditory temporal processing deficits in older  
564 listeners. Neural phase locking also improves with training, but there was no relationship among  
565 behavioral and neural measurements with the tested rates. At least one measure of cognitive  
566 function, response inhibition/attention, accounts for significant variance in improvement in rate  
567 discrimination. Therefore, the paradigm used in the study protocol may be efficacious for  
568 individuals with average attention ability, but individuals with impaired attention or cognitive  
569 function may benefit from a different paradigm.

570 *Acknowledgments*

571 We would like to acknowledge the P01 Project 2 team (Graduate assistants: Alyson Schapira,  
572 Rachel Zimmerman, Abigail Poe, Logan Fraser, Mary Zhou, Jennifer Borja, Sydney Hancock,  
573 Alexandra Papanicolau, Andrew Morris, and Amarachukwa Ezenwa; Human Subject Research  
574 Coordinator: Carol Gorham) for dedication and hard work, and we thank Beverly Wright for her  
575 suggestions regarding the training and testing protocols. We would also like to thank the NIH  
576 National Institute on Aging for funding this project (P01 5P01AG055365).

577

578 *References*

- 579 Anderson S, White-Schwoch T, Parbery-Clark A, Kraus N (2013) Reversal of age-related neural  
580 timing delays with training Proc Natl Acad Sci U S A 110:4357-4362  
581 doi:<https://doi.org/10.1073/pnas.1213555110>
- 582 Banai K, Lavner Y (2019) Effects of stimulus repetition and training schedule on the perceptual  
583 learning of time-compressed speech and its transfer Atten Percept Psychophys 81:2944-  
584 2955 doi:<https://doi.org/10.3758/s13414-019-01714-7>
- 585 Bissmeyer SRS, Hossain S, Goldsworthy RL (2020) Perceptual learning of pitch provided by  
586 cochlear implant stimulation rate PLoS One 15:e0242842  
587 doi:<https://doi.org/10.1371/journal.pone.0242842>
- 588 Burk MH, Humes LE (2008) Effects of long-term training on aided speech-recognition  
589 performance in noise in older adults J Speech Lang Hear Res 51:759-771  
590 doi:[https://doi.org/10.1044/1092-4388\(2008/054\)](https://doi.org/10.1044/1092-4388(2008/054))

- 591 de Villers-Sidani E, Alzghoul L, Zhou X, Simpson KL, Lin RCS, Merzenich MM (2010)  
592 Recovery of functional and structural age-related changes in the rat primary auditory  
593 cortex with operant training Proceedings of the National Academy of Sciences - USA  
594 107:13900-13905 doi:<https://doi.org/10.1073/pnas.1007885107>
- 595 Delorme A, Makeig S (2004) EEGLAB: an open source toolbox for analysis of single-trial EEG  
596 dynamics including independent component analysis J Neurosci Methods 134:9-21  
597 doi:<http://dx.doi.org/10.1016/j.jneumeth.2003.10.009>
- 598 Fitzgerald MB, Wright BA (2011) Perceptual learning and generalization resulting from training  
599 on an auditory amplitude-modulation detection task J Acoust Soc Am 129:898-906  
600 doi:<https://doi.org/10.1121/1.3531841>
- 601 Fitzgibbons PJ, Gordon-Salant S (1994) Age effects on measures of auditory duration  
602 discrimination J Speech Hear Res 37:662 doi:<https://doi.org/10.1044/jshr.3703.662>
- 603 Fitzgibbons PJ, Gordon-Salant S (1996) Auditory temporal processing in elderly listeners J Am  
604 Acad Audiol 7:183-189
- 605 Fitzgibbons PJ, Gordon-Salant S (2001) Aging and temporal discrimination in auditory  
606 sequences J Acoust Soc Am 109:2955-2963 doi:<https://doi.org/10.1121/1.1371760>
- 607 Fitzgibbons PJ, Gordon-Salant S (2011) Age effects in discrimination of repeating sequence  
608 intervals J Acoust Soc Am 129:1490-1500 doi:<https://doi.org/10.1121/1.3533728>
- 609 Fostick L, Taitelbaum-Swead R, Kreidler S, Zokraut S, Billig M (2020) Auditory training to  
610 improve speech perception and self-efficacy in aging adults J Speech Lang Hear Res  
611 63:1270-1281 doi:[https://doi.org/10.1044/2019\\_jslhr-19-00355](https://doi.org/10.1044/2019_jslhr-19-00355)
- 612 Gaskins C, Jaekel BN, Gordon-Salant S, Goupell MJ, Anderson S (2019) Effects of aging on  
613 perceptual and electrophysiological responses to acoustic pulse trains as a function of rate

- 614 J Speech Lang Hear Res 62:1087-1098 doi:[https://doi.org/10.1044/2018\\_jslhr-h-asc7-](https://doi.org/10.1044/2018_jslhr-h-asc7-)  
615 [18-0133](https://doi.org/10.1044/2018_jslhr-h-asc7-18-0133)
- 616 Goldsworthy RL, Shannon RV (2014) Training improves cochlear implant rate discrimination on  
617 a psychophysical task J Acoust Soc Am 135:334-341  
618 doi:<https://doi.org/10.1121/1.4835735>
- 619 Herdman AT, Picton TW, Stapells DR (2002) Place specificity of multiple auditory steady-state  
620 responses J Acoust Soc Am 112:1569-1582 doi:<https://doi.org/10.1121/1.1506367>
- 621 Hetherington R (1954) The Snellen chart as a test of visual acuity Psychol Forsch 24:349-357  
622 doi:<https://doi.org/10.1007/BF00422033>
- 623 IEEE (1969) IEEE recommended practice for speech quality measurements.  
624 doi:<https://doi.org/10.1109/IEEESTD.1969.7405210>
- 625 Jenkins KA, Fodor C, Presacco A, Anderson S (2018) Effects of amplification on neural phase  
626 locking, amplitude, and latency to a speech syllable Ear Hear 39:810-824  
627 doi:<https://doi.org/10.1097/aud.0000000000000538>
- 628 Karawani H, Bitan T, Attias J, Banai K (2015) Auditory Perceptual Learning in Adults with and  
629 without Age-Related Hearing Loss Front Psychol 6:2066  
630 doi:<https://doi.org/10.3389/fpsyg.2015.02066>
- 631 Koziol LF, Budding DE (2012) Procedural Learning. In: Seel NM (ed) Encyclopedia of the  
632 Sciences of Learning. Springer US, Boston, MA, pp 2694-2696.  
633 doi:[https://doi.org/10.1007/978-1-4419-1428-6\\_670](https://doi.org/10.1007/978-1-4419-1428-6_670)
- 634 Lakshminarayanan K, Tallal P (2007) Generalization of non-linguistic auditory perceptual  
635 training to syllable discrimination Restor Neurol Neurosci 25:263-272

- 636 Levitt H (1971) Transformed up-down methods in psychoacoustics J Acoust Soc Am 49:Suppl  
637 2:467+
- 638 Manheim M, Lavie L, Banai K (2018) Age, hearing, and the perceptual learning of rapid speech  
639 Trends Hear 22:2331216518778651-2331216518778651  
640 doi:<https://doi.org/10.1177/2331216518778651>
- 641 Nasreddine ZS et al. (2005) The Montreal Cognitive Assessment, MoCA: A brief screening tool  
642 for mild cognitive impairment J Am Geriatr Soc 53:695-699  
643 doi:<http://dx.doi.org/10.1111/j.1532-5415.2005.53221.x>
- 644 Pichora-Fuller MK, Schneider BA, MacDonald E, Pass HE, Brown S (2007) Temporal jitter  
645 disrupts speech intelligibility: A simulation of auditory aging Hear Res 223:114-121  
646 doi:<https://doi.org/10.1016/j.heares.2006.10.009>
- 647 Roque L, Gaskins C, Gordon-Salant S, Goupell MJ, Anderson S (2019a) Age effects on neural  
648 representation and perception of silence duration cues in speech J Speech Lang Hear Res  
649 62:1099-1116 doi:[https://doi.org/10.1044/2018\\_jslhr-h-asc7-18-0076](https://doi.org/10.1044/2018_jslhr-h-asc7-18-0076)
- 650 Roque L, Karawani H, Gordon-Salant S, Anderson S (2019b) Effects of age, cognition, and  
651 neural encoding on the perception of temporal speech cues Front Neurosci 13:749  
652 doi:<https://doi.org/10.3389/fnins.2019.00749>
- 653 Sabin A, Clark C, Eddins D, Wright B (2013) Different patterns of perceptual learning on  
654 spectral modulation detection between older hearing-impaired and younger normal-  
655 hearing adults J Assoc Res Otolaryngol 14:283-294 doi:[https://doi.org/10.1007/s10162-](https://doi.org/10.1007/s10162-012-0363-y)  
656 [012-0363-y](https://doi.org/10.1007/s10162-012-0363-y)

- 657 Sabin AT, Eddins DA, Wright BA (2012) Perceptual learning evidence for tuning to  
658 spectrotemporal modulation in the human auditory system J Neurosci 32:6542-6549  
659 doi:<https://doi.org/10.1523/jneurosci.5732-11.2012>
- 660 Studebaker GA (1985) A "rationalized" arcsine transform Journal of speech and hearing research  
661 28:455-462 doi:<https://doi.org/10.1044/jshr.2803.455>
- 662 Tallon-Baudry C, Bertrand O, Delpuech C, Pernier J (1996) Stimulus specificity of phase-locked  
663 and non-phase-locked 40 hz visual responses in human J Neurosci 16:4240-4249 doi:  
664 <https://doi.org/10.1523/JNEUROSCI.16-13-04240.1996>
- 665 Tillman TW, Carhart R (1966) An expanded test for speech discrimination utilizing CNC  
666 monosyllabic words. Northwestern University Auditory Test No. 6. SAM-TR-66-55 Tech  
667 Rep SAM-TR:1-12 doi:<https://doi.org/10.21236/ad0639638>
- 668 Weintraub S et al. (2013) Cognition assessment using the NIH Toolbox Neurology 80:S54-S64  
669 1doi:<https://doi.org/10.1212/WNL.0b013e3182872ded>
- 670 Whitton JP, Hancock KE, Shannon JM, Polley DB (2017) Audiomotor perceptual training  
671 enhances speech intelligibility in background noise Curr Biol 27:3237-3247.e3236  
672 doi:<https://doi.org/10.1016/j.cub.2017.09.014>
- 673 Wright BA, Wilson RM, Sabin AT (2010) Generalization lags behind learning on an auditory  
674 perceptual task J Neurosci 30:11635-11639 doi:[https://doi.org/10.1523/jneurosci.1441-  
675 10.2010](https://doi.org/10.1523/jneurosci.1441-10.2010)
- 676



677 *Tables and Captions*

678

| Group  | Experimental          |                        |                        | Active Control        |                        |                       |
|--------|-----------------------|------------------------|------------------------|-----------------------|------------------------|-----------------------|
|        | YNH<br>(n=14)         | ONH<br>(n=16)          | OHI<br>(n=10)          | YNH<br>(n=15)         | ONH<br>(n=14)          | OHI<br>(n=8)          |
| Sex    | 7 F                   | 15 F                   | 8 F                    | 9 F                   | 12 F                   | 7 F                   |
| Age    | 21.1 (M)<br>2.2 (S.D) | 69.9 (M)<br>4.0 (S.D)  | 74.0(M)<br>6.4 (S.D)   | 21.0 (M)<br>2.0 (S.D) | 70.0 (M)<br>4.5 (S.D)  | 74.4(M)<br>6.4 (S.D)  |
| HF PTA | 5.5 (M)<br>2.6 (S.D)  | 14.1 (M)<br>3.0 (S.D.) | 38.2 (M)<br>4.4 (S.D.) | 6.2 (M)<br>2.9 (S.D)  | 13.9 (M)<br>4.3 (S.D.) | 36.8 (M)<br>7.1 (S.D) |

Table 1  
Demographic  
Characteristics

687

688 Table 1. Demographic characteristics of Experimental and Active Control groups including Sex,  
689 Age, and High-Frequency Pure-Tone Average (HF PTA). YNH = young normal hearing, ONH =  
690 older normal hearing, OHI = older hearing impaired, F = female, M = mean, and S.D. = standard  
691 deviation.

692

693 Table 2

694 *Summary of “Stepwise” regression analysis for variables contributing to change in rate*  
695 *discrimination*

| Variable | R <sup>2</sup> change | B    | S.E. | β    | 95% C.I. for B | p value |
|----------|-----------------------|------|------|------|----------------|---------|
| Model 1  | 0.35                  |      |      |      |                | <0.001  |
| Flanker  |                       | 0.26 | 0.06 | 0.59 | 0.14-0.39      | <0.001  |

696

697 Table 2. Unstandardized (B) and standard error (S.E.) coefficients and standardized (β)  
698 coefficients in a model automatically generated by evaluating the significance of each variable’s  
699 contribution to the average change in 100- and 300-Hz rate discrimination. Only one model was  
700 generated, in which the Flanker score predicts significant variance in rate discrimination change.  
701 All other variables were excluded from the model (Working memory, speed of processing,  
702 dimension card sort, pure-tone average, pre-training phase-locking factor, and change in phase-  
703 locking factor).

704

705 *Figures and Captions*

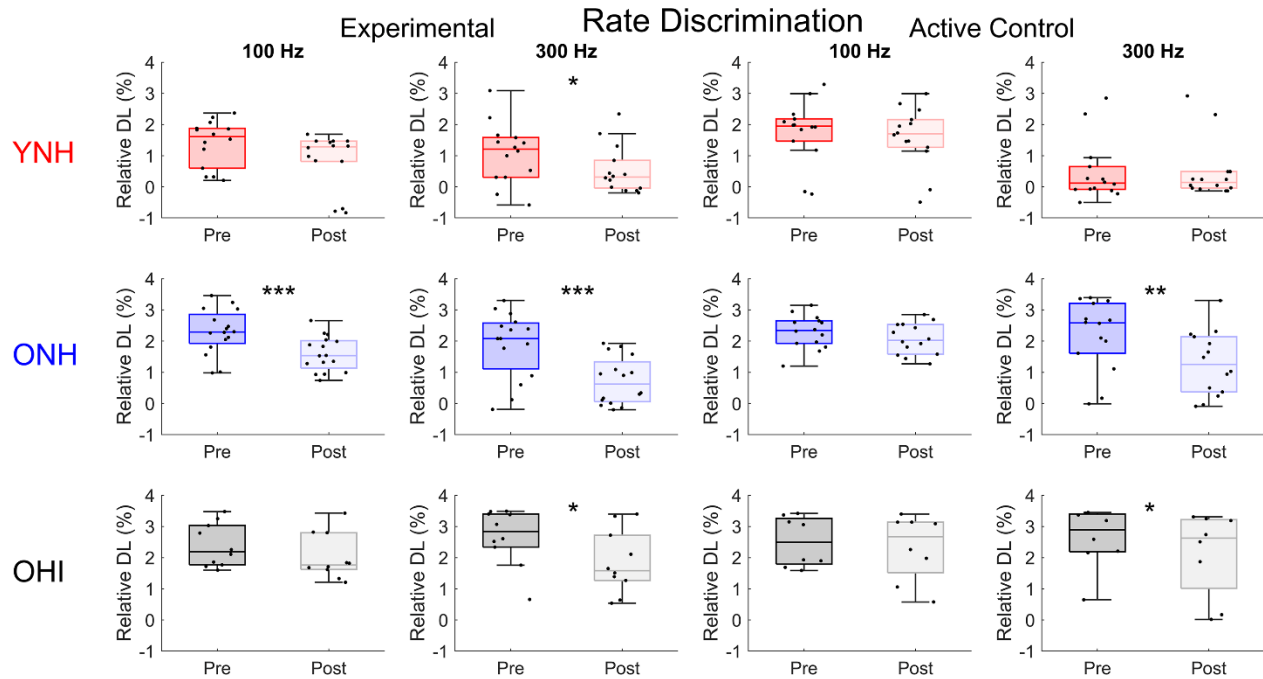

706

707 Figure 1. Rate discrimination at two training rates. Box plots and individual data points  
708 displaying pre- and post-training relative difference limens (DL) as a function of 100- and 300-  
709 Hz rates obtained in young normal-hearing (YNH), older normal-hearing (ONH), and older  
710 hearing-impaired (OHI) listeners who completed nine sessions of rate-discrimination training  
711 (experimental group) or tone-in-noise detection training (active control group). Note that these  
712 percentages are log-transformed. There were significant improvements in performance (smaller  
713 DLs) in the experimental group that were not observed in the active control group. \*P < 0.05, \*\*P  
714 < 0.01, \*\*\*P < 0.001. Medians: Inside box lines. Upper and lower quartiles: top and bottom  
715 edges of the box, respectively. The endpoints of the whiskers represent the range of values without the  
716 outliers.

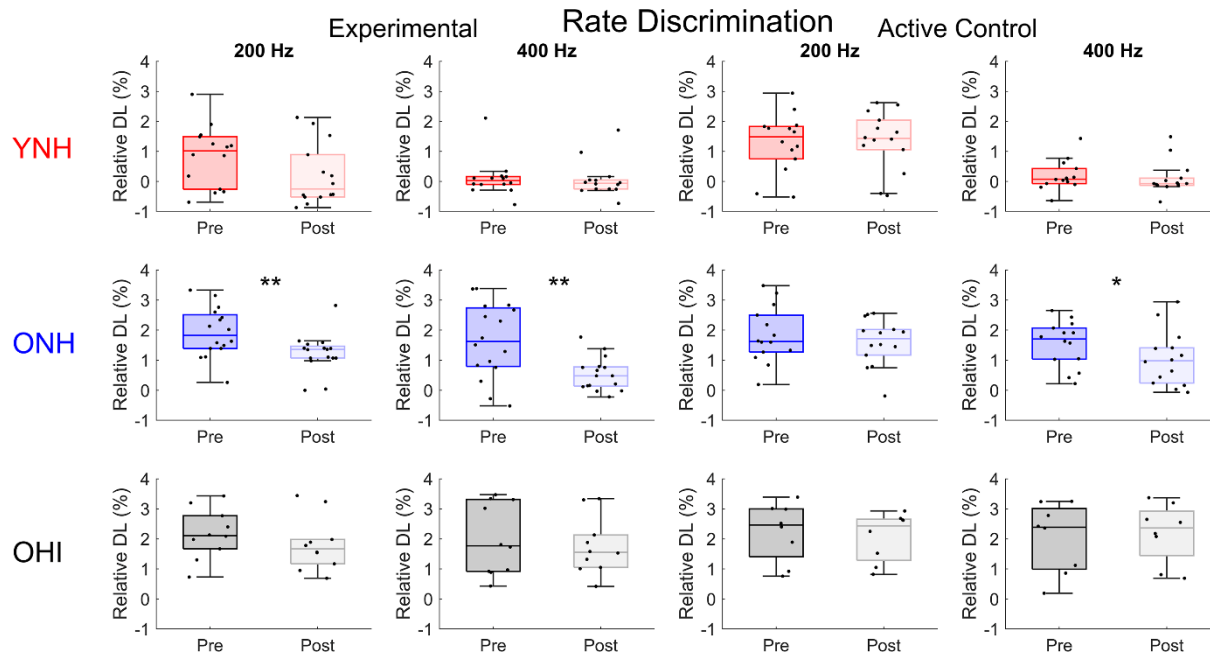

717

718 Figure 2. Rate discrimination at two untrained rates. Box plots and individual data points  
719 displaying difference limens (DLs) as a function of 200- and 400-Hz rates obtained in young  
720 normal-hearing (YNH), older normal-hearing (ONH), and older hearing-impaired (OHI) listeners  
721 who completed nine sessions of rate discrimination training (experimental) or signal detection in  
722 noise training (active control). Note that these percentages are log-transformed. There were  
723 significant improvements in performance (decreased DLs) in the experimental group (especially  
724 the ONH and OHI), that were not observed in the active control group (except for the ONH 400-  
725 Hz rate). \* $P < 0.05$ , \*\* $P < 0.01$ . Medians: Inside box lines. Upper and lower quartiles: top and  
726 bottom edges of the box, respectively. The endpoints of the whiskers represent the range of  
727 values without the outliers.

728

729

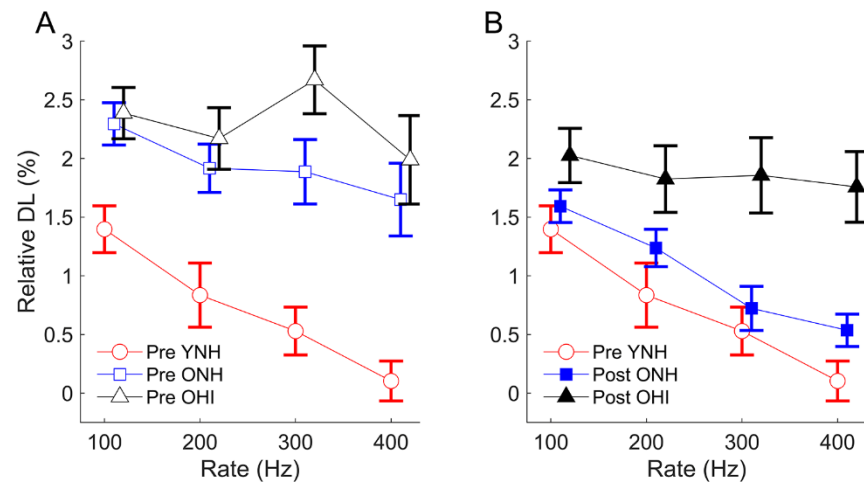

730

731 Figure 3. Relative DLs (log-transformed) are compared between young normal-hearing (YNH),  
732 older normal-hearing (ONH), and older hearing-impaired (OHI) experimental training groups for  
733 pre-test data (Panel A) and between pre-test YNH and post-test ONH and OHI groups (Panel B).  
734 The pre-test differences between YNH and ONH groups were not present at post-test, but  
735 differences persisted for the OHI groups. Errors bars:  $\pm 1$  S.E.

736

737

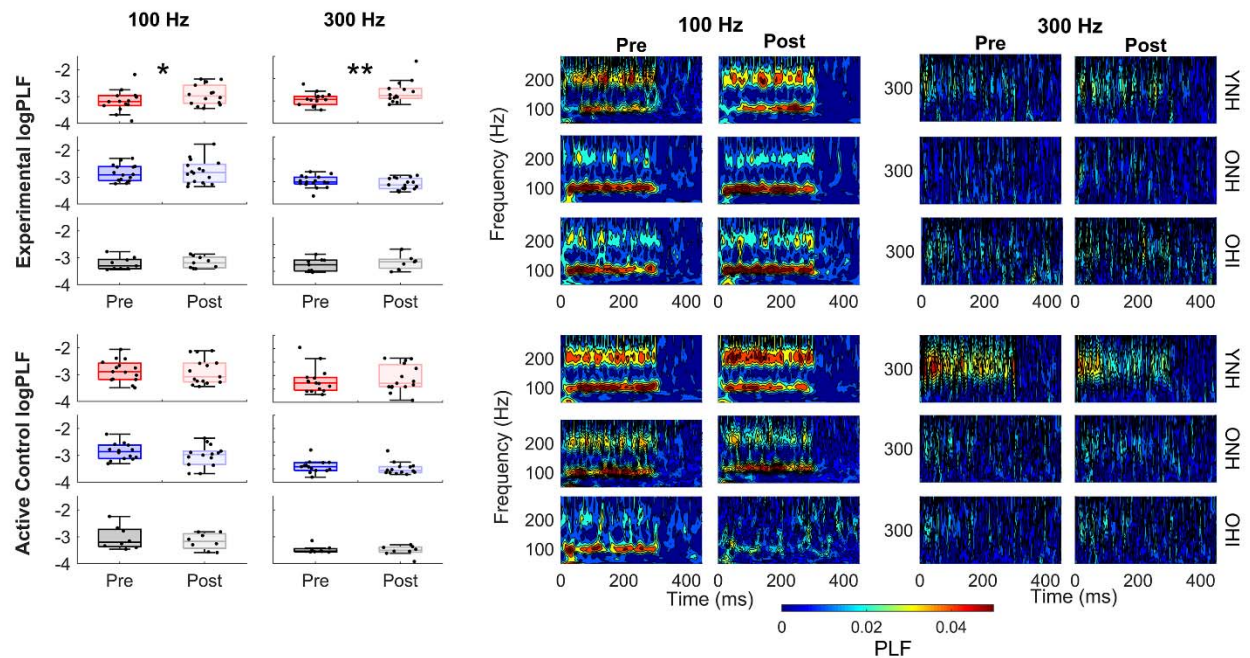

738

739 Figure 4. Pre- and post-training phase-locking factor (PLF) for 100- and 300-Hz rates is  
 740 displayed in box plots and in the time-frequency domain for young normal-hearing (YNH), older  
 741 normal-hearing (ONH), and older hearing-impaired (OHI) listeners in the experimental (top three  
 742 panels) and active control (bottom three panels) groups. Note that these values are log-  
 743 transformed. There were significant increases in PLF in the training group, especially in the  
 744 YNH listeners, that were not observed in the active control group. \* $P < 0.05$ , \*\* $P < 0.01$ .  
 745 Medians: Inside box lines. Upper and lower quartiles: top and bottom edges of the box,  
 746 respectively. The endpoints of the whiskers represent the range of values without the outliers.

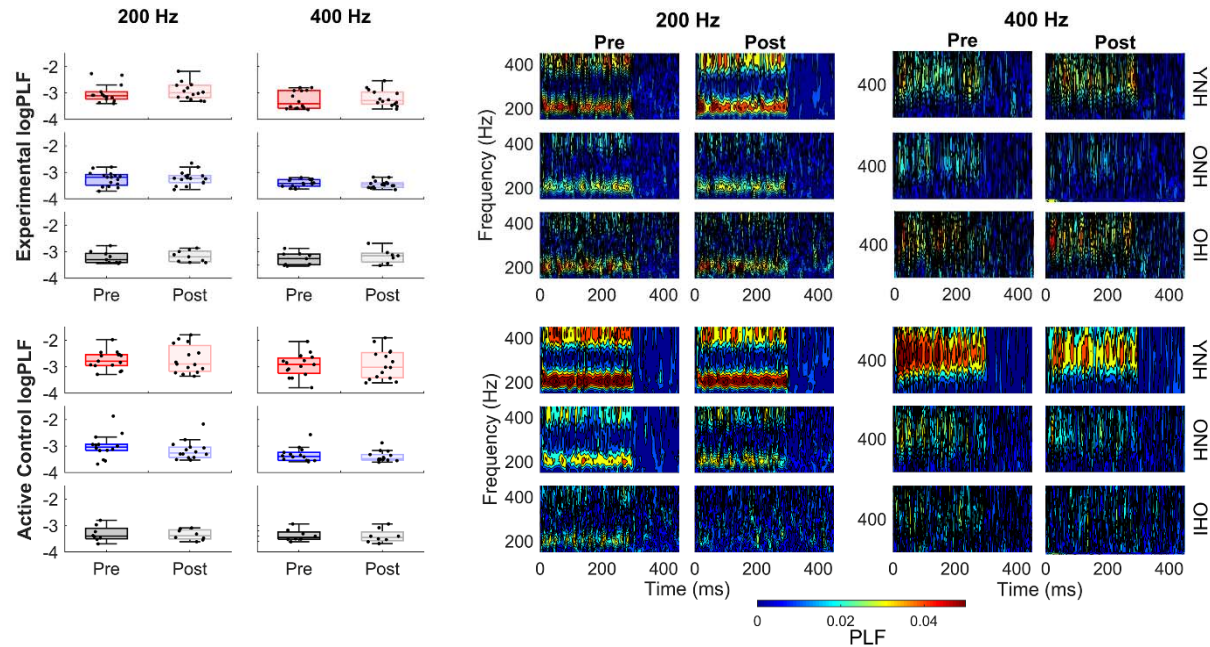

747

748 Figure 5. Pre- and post-training phase-locking factor (PLF) for 200- and 400-Hz rates is  
749 displayed in box plots and in the time-frequency domain for young normal-hearing (YNH), older  
750 normal-hearing (ONH), and older hearing-impaired (OHI) listeners in the experimental (top three  
751 panels) and active control (bottom three panels) groups. No increases in PLF were noted in any  
752 group. Medians: Inside box lines. Upper and lower quartiles: top and bottom edges of the box,  
753 respectively. The endpoints of the whiskers represent the range of values without the outliers.

754

755

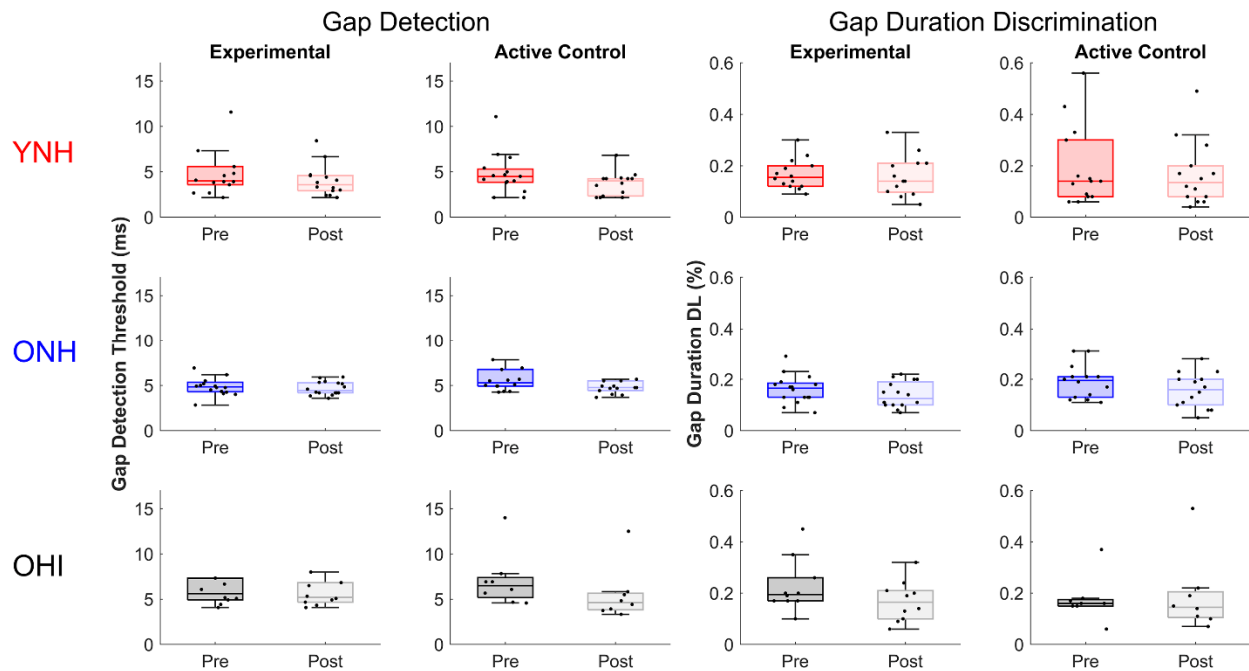

756 Figure 6. Pre- and post-training gap detection thresholds and gap duration DLs are displayed in  
757 box plots and individual data points for young normal-hearing (YNH), older normal-hearing  
758 (ONH), and older hearing-impaired (OHI) listeners in the experimental and active control  
759 groups. No changes in performance were noted from pre-test to post-test in any group. Medians:  
760 Inside box lines. Upper and lower quartiles: top and bottom edges of the box, respectively. The  
761 endpoints of the whiskers represent the range of values without the outliers.

762



763

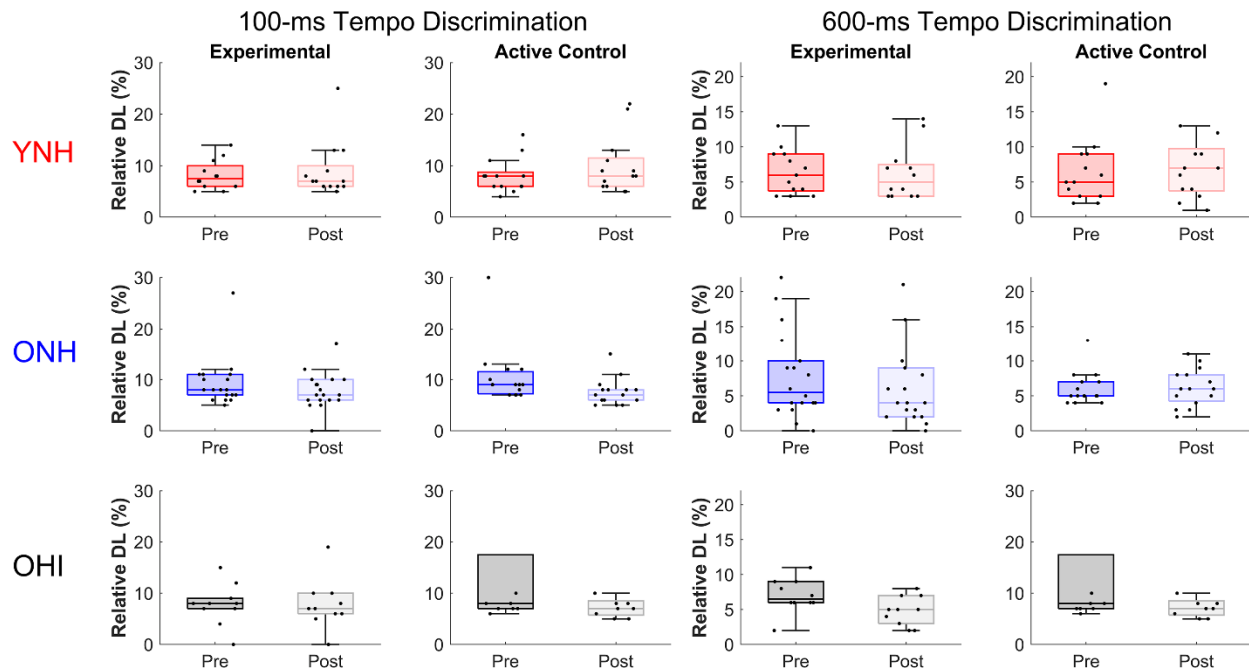

764 Figure 7. Box plots and individual data points for relative difference limens (DL) as a function of  
765 100- and 600-ms inter-onset intervals (IOIs) obtained in young normal-hearing (YNH), older  
766 normal-hearing (ONH), and older hearing-impaired (OHI) listeners in the experimental and  
767 active control groups. No changes in performance were noted in any group. Medians: Inside box  
768 lines. Upper and lower quartiles: top and bottom edges of the box, respectively. The endpoints of  
769 the whiskers represent the range of values without the outliers.

770

771

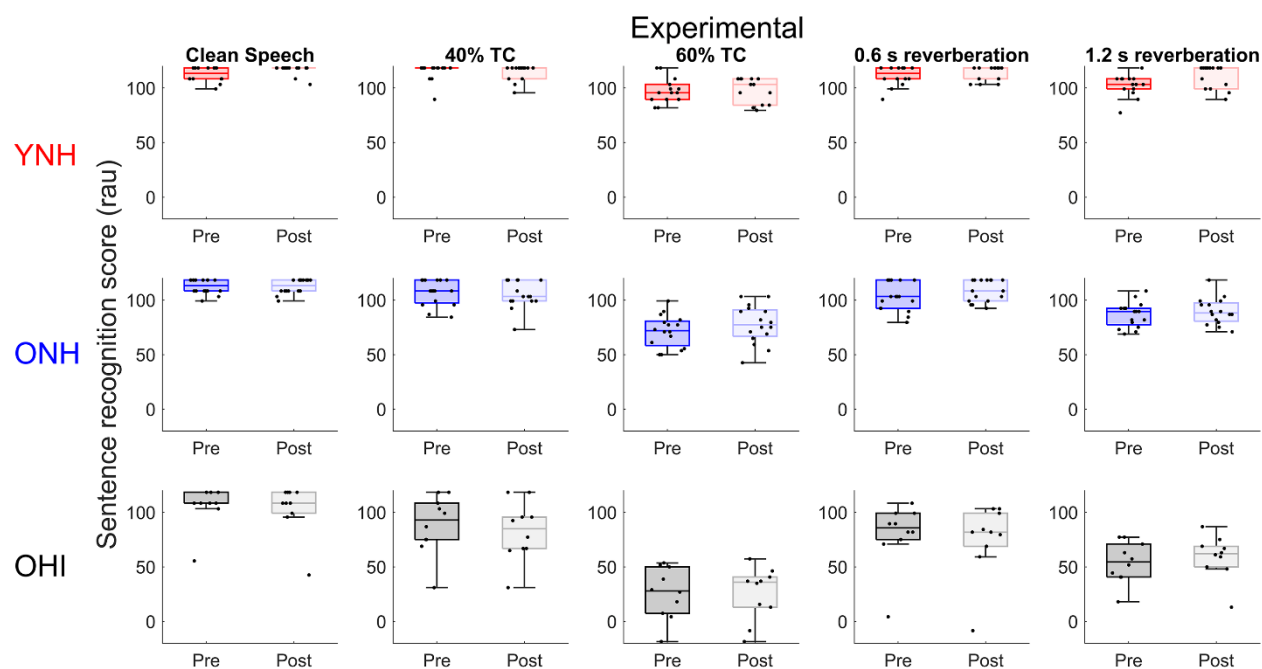

772 Figure 8. Experimental group. Box plots and individual data points displayed for rau-transformed  
773 percent of correct items pre- and post-training for clean (undistorted) speech, 40% time-  
774 compressed speech (40% TC), 60% time-compressed speech (60% TC), and 0.6 s and 1.2 s  
775 reverberation time in young normal-hearing (YNH), older normal-hearing (ONH), and older  
776 hearing-impaired (OHI) listeners in the experimental group. No changes in performance were  
777 noted in any listener group. Medians: Inside box lines. Upper and lower quartiles: top and  
778 bottom edges of the box, respectively. The endpoints of the whiskers represent the range of  
779 values without the outliers. Rau: rationalized arcsine transform

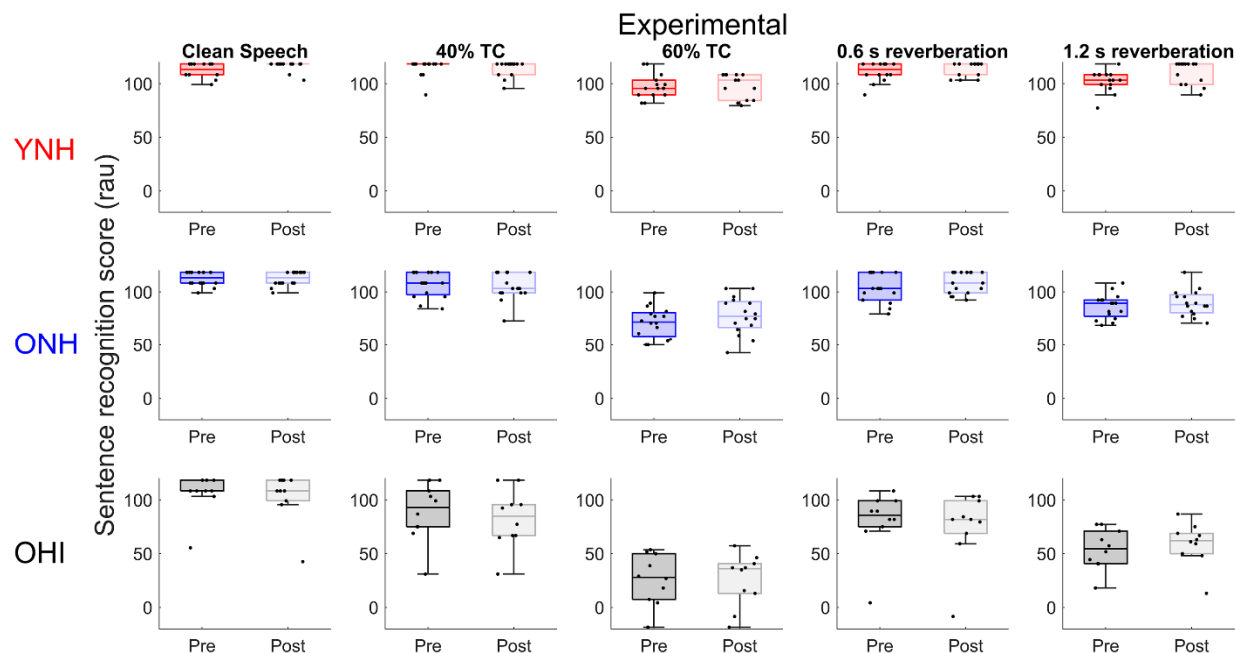

780  
781 Figure 9. Active control. Box plots and individual data points displayed for rau-transformed  
782 percent of correct items pre-and post-training for clean speech, 40% time-compressed speech  
783 (40% TC), 60% time-compressed speech (60% TC), and 0.6 s and 1.2 s reverberation time in  
784 young normal-hearing (YNH), older normal-hearing (ONH), and older hearing-impaired (OHI)  
785 listeners in the active control group. No changes in performance were noted in any listener  
786 group. Medians: Inside box lines. Upper and lower quartiles: top and bottom edges of the box,  
787 respectively. The endpoints of the whiskers represent the range of values without the outliers.  
788 Rau: rationalized arcsine transform

789

790

791

792

793
